# Supplementary material
Source: PubMed Central journal article supplement (PMC2675719)
Supplement: pp.109.137034_1.pdf [file pp.109.137034_1.pdf]

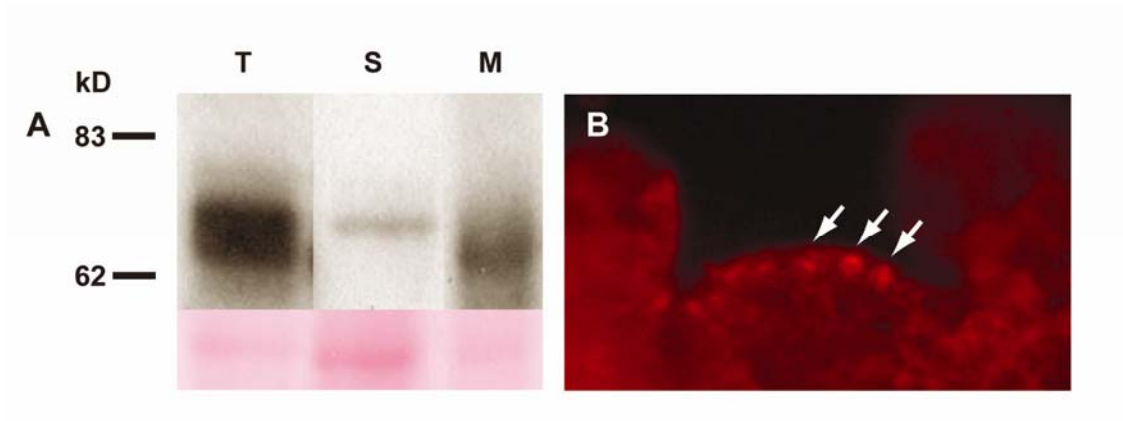

**Supplemental Figure S1.** Maize PIN1 is detected by an Arabidopsis PIN1 antiserum. A, Immunodetection of maize PIN1 by Arabidopsis PIN1 antiserum. Maize proteins were extracted from shoot apices. T, total fraction; S, soluble fraction; M, membrane fraction. Ponceau S membrane staining is to show equal loading. B, Arabidopsis PIN1 immunolocalization showing expression in L1 layer (White arrows).

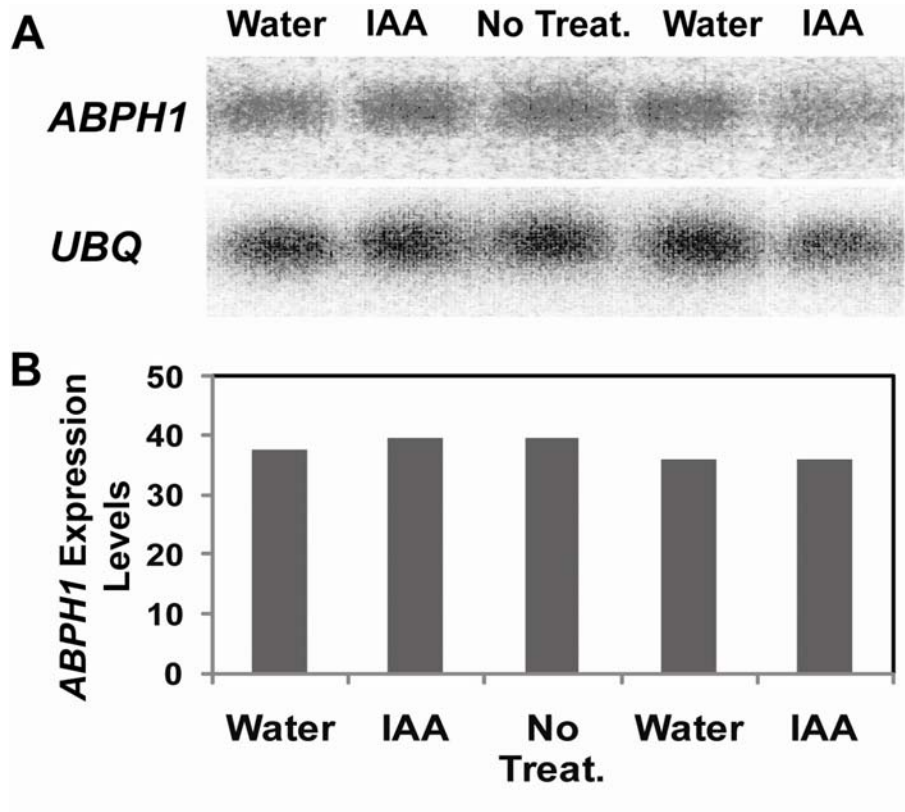

**Supplemental Figure S2.** *ABPH1* is not induced by auxin. A, Roots were removed from two week old seedlings by excising at the shoot-root junction. The shoots were then stood in  $10^{-5}$  M IAA solution or water control for 2 h. Total RNAs were extracted from apices from each treatment. Semi-quantitative RT-PCR and DNA blotting were carried out as described previously (Giulini et al., 2004). Results from two biological replicates are shown. No Treat., No treatment, time zero control; UBQ, ubiquitin as a loading control. B, Quantification of *ABPH1* expression levels shown in (A). *ABPH1* expression levels were normalized relative to ubiquitin expression, and are expressed in arbitrary units.

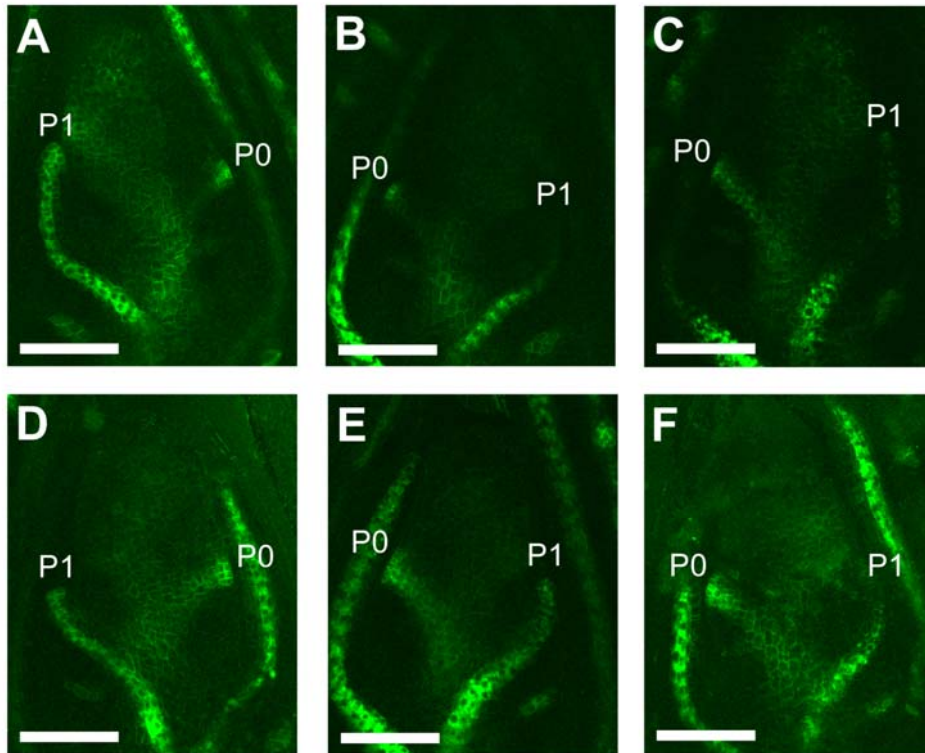

**Supplemental Figure S3.** Cytokinin treatment induces ZmPIN1a-YFP in the P<sub>0</sub> leaf primordium. Seedlings expressing ZmPIN1-YFP were excised at the shoot-root junction and treated with either 100  $\mu$ M kinetin or a control solution for 4 h. Median longitudinal sections were taken through the SAM and imaged by confocal microscopy. A-C, SAMs of seedlings treated with control solution. D-F, SAMs of seedlings treated with kinetin. Scale bars = 100  $\mu$ m.

**Supplemental Table S1. Contents of cytokinins, auxin and related compounds in normal and *abph1* embryos**

| Hormone and Compound | normal  |        | <i>abph1</i> |       |
|----------------------|---------|--------|--------------|-------|
|                      | Average | S.E.   | Average      | S.E.  |
| IAA                  | 1091.89 | 326.73 | 421.37       | 47.33 |
| IAAsp                | 268.58  | 23.91  | 169.57       | 23.78 |
| tZ                   | 3.00    | 0.50   | 3.23         | 0.26  |
| tZR                  | 15.34   | 1.82   | 14.32        | 0.23  |
| tZRMP                | 89.75   | 7.62   | 96.72        | 4.89  |
| cZR                  | 2.49    | 0.33   | 2.81         | 0.31  |
| cZRMP                | 0.89    | 0.23   | 0.76         | 0.03  |
| DZR                  | 0.44    | 0.11   | 0.66         | 0.19  |
| iPR                  | 4.09    | 0.67   | 3.47         | 0.20  |
| iPRMP                | 69.43   | 6.10   | 98.46        | 0.87  |
| tZ7G                 | 10.60   | 1.42   | 12.58        | 0.77  |
| tZ9G                 | 200.04  | 25.04  | 426.17       | 20.68 |
| tZROG                | 1.24    | 0.17   | 1.24         | 0.24  |
| IP9G                 | 1.63    | 0.16   | 3.24         | 0.50  |

Unit= pmole/Fresh weight (g)

Averages were calculated from three independent biological pools of ~10 embryos. S.E., standard error

IAA, indole-3-acetic acid; IAAsp, indole-3-acetylaspatic acid; tZ, trans-zeatin; tZR, tZ riboside; tZRMP, tZR 5'-monophosphate; cZR, cis-zeatin riboside; cZRMP, cZR 5'-monophosphate; DZR, dihydrozeatin riboside; iPR, N<sup>6</sup>-( $\Delta^2$ -isopentenyl)adenine riboside; iPRMP, iPR 5'-monophosphate; tZ7G, tZ N7-glucoside; tZ9G, tZ N9-glucoside; tZROG, tZR O-glucoside; iP9G, iP N9-glucoside

**Supplemental Table S2. Quantification of ZmPIN1a-YFP fluorescence in the SAM of kinetin treated and control seedlings**

| Treatment | Area P <sub>0</sub> (μm <sup>2</sup> ) | Mean intensity in entire P <sub>0</sub> | Integrated density | Mean intensity in center of P <sub>0</sub> | N  |
|-----------|----------------------------------------|-----------------------------------------|--------------------|--------------------------------------------|----|
| Control   | 579 (31)                               | 48 (3)                                  | 27143 (2009)       | 56 (4)                                     | 16 |
| Kinetin   | 703 (33)                               | 57 (5)                                  | 40344 (4156)       | 70 (7)                                     | 14 |
| P-value   | 0.014                                  | 0.088                                   | 0.006              | 0.095                                      |    |

Seedlings expressing the ZmPIN1a-YFP construct were treated for 4 h with 100 μM kinetin or control solution. Median longitudinal hand sections of each SAM were imaged by confocal microscopy, and fluorescence was quantified using ImageJ software. For each section, the P<sub>0</sub> site of leaf initiation, marked by high PIN1-YFP expression, was selected using the polygon tool. Mean fluorescence intensity (on a scale of 0-255) and the area of the P<sub>0</sub> were calculated for the selected region. Integrated density was calculated by multiplying the mean fluorescence intensity by the area. Mean fluorescence intensity was also quantified for a square with a set area of 225 μm<sup>2</sup> (15 μm x 15 μm) that was centred on the P<sub>0</sub> leaf primordium of each sample. The values obtained were compared using a student's t-test. Numbers in brackets = standard error, N = sample size.
